# Supplementary material
Source: PubMed Central journal article supplement (PMC2287330)
Supplement: plntphys_pp.107.114090_1.pdf [file plntphys_pp.107.114090_1.pdf]

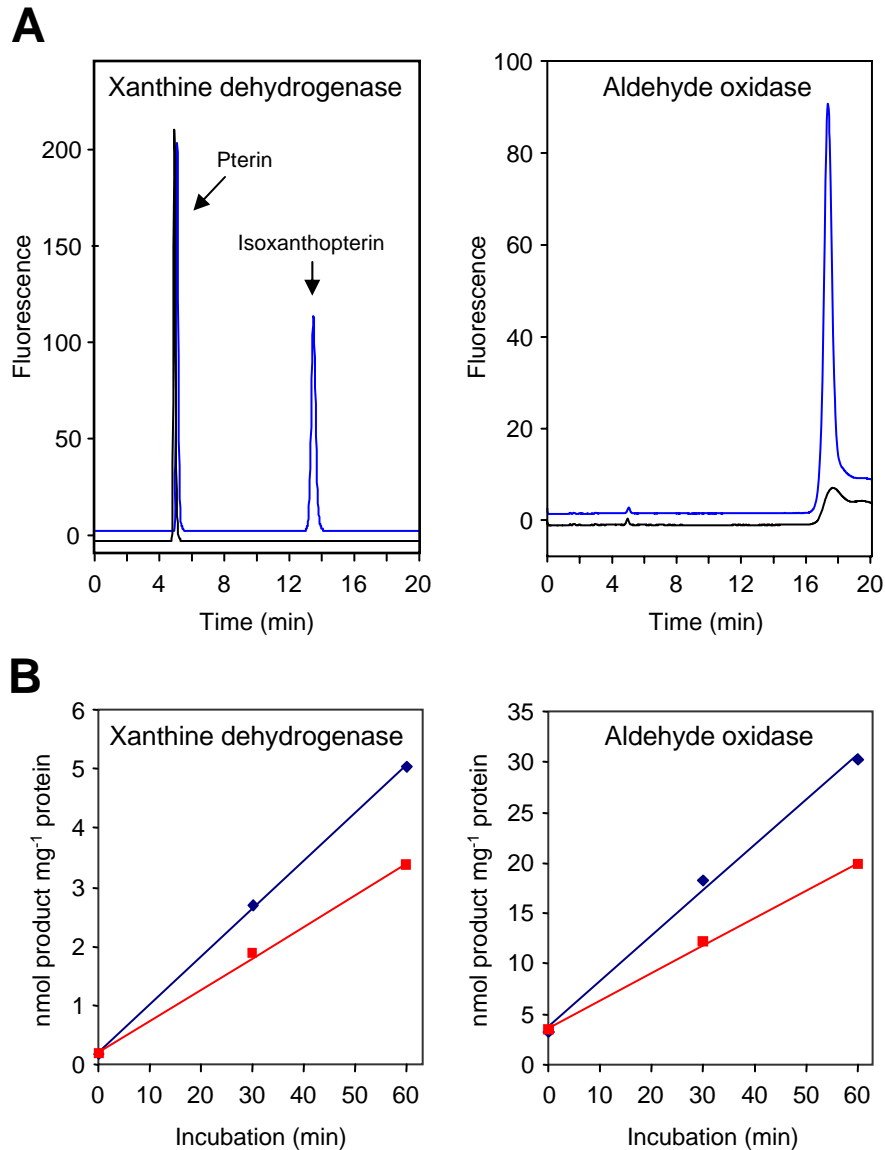

**Supplemental Figure S1.** Xanthine dehydrogenase and aldehyde oxidase assays by HPLC. The xanthine dehydrogenase substrate was pterin; the aldehyde oxidase substrate was indole-3-carboxaldehyde. A, Fluorometric HPLC chromatograms of xanthine dehydrogenase and aldehyde oxidase assay mixtures at zero time (black lines) and after 60 min incubation (blue lines). For the xanthine dehydrogenase assay, the eluting buffer was 20 mM glycine, pH 2.5. For the aldehyde oxidase reaction, only the product, indole-3-carboxylic acid, was eluted during the isocratic separation, the substrate being retained on the column until the washing step with acetonitrile (see 'Materials and Methods'). B, Progress curves for selected xanthine dehydrogenase and aldehyde oxidase assays, using desalted Arabidopsis proteins isolated by ammonium sulfate precipitation. Data are for individual assays of wild type (blue lines) and mutant (red lines) samples, and have not been corrected for the traces of product present in zero time and minus enzyme blanks.
