# Supplementary material
Source: PubMed Central journal article supplement (PMC2287330)
Supplement: plntphys_pp.107.114090_2.pdf [file plntphys_pp.107.114090_2.pdf]

## SUPPLEMENTAL TABLE S2

*Synthetic oligonucleotides used to amplify COG2154 sequences for complementation tests*

Restriction sites are underlined. Stop codons in frame with LacZ of the pBluescript vector are in orange. Shine-Dalgarno sequences are in blue. Start codons are in green. Stop anticodons are in red.

| <b>Plant COG2154 type 1</b>       |                                                                     |                                       |
|-----------------------------------|---------------------------------------------------------------------|---------------------------------------|
| Organism                          | Forward (5'-3')                                                     | Reverse (5'-3')                       |
| <i>Arabidopsis thaliana</i>       | <u>GGG</u> <u>CTGAAGGAAA</u> CAGCTATGGCTAGAACATTTTGCTC <sup>a</sup> | TAGCTCTCGAGTCACTTAGCAACTTCTTCTT       |
| <i>Chlamydomonas reinhardtii</i>  | AGTCACATATGTGCCAGGGGCCGACGCGG                                       | AGTAGGTACCCTAGCTGGAGCCGCGTCCGC        |
| <i>Physcomitrella patens</i>      | CTAGGGATCCATGAAGGAAACAGCTATGCAAGAAGG                                | CTAGGAATCTTAAGCTAGGAGCTGCTTTGGTT      |
| <i>Pinus taeda</i>                | CTAGTCTAGAAATGAAGGAAACAGCTATGAAATGTTT                               | CTAGGAATCTTAAGTCTTTGCAGCTTCTTT        |
| <i>Zea mays</i>                   | AGTCACATATGTGCCATAGCTCCCTGAGAGT                                     | AGTAGGTACCCTATTAGCTTCTTCTTATAATGCC    |
| <b>Plant COG2154 type 2</b>       |                                                                     |                                       |
| Organism                          | Forward (5'-3')                                                     | Reverse (5'-3')                       |
| <i>Arabidopsis thaliana</i>       | CTAGTCTAGAAATGAAGGAAACAGCTATGCAAGATTTCTGGTGACTTC                    | CTAGGAATCTCACGCCCAAGCTCTTTTCC         |
| <i>Chlamydomonas reinhardtii</i>  | AGTCACATATGGGAATGTTCCGGCAGAACTTC                                    | AGTAGGTACCCTAGCACCAGAAAGCGTGT         |
| <i>Physcomitrella patens</i>      | AGTCACATATGGGGCAGATGTTGGGTGA                                        | AGTAGGTACCCTAGAACCATGTCGGAAG          |
| <i>Pinus taeda</i>                | AGTCACATATGGGGATCTTCTAGGTGACTTT                                     | AGTAGGTACCCTAAGCCCAAAATCTTTTCTGG      |
| <i>Zea mays</i>                   | AGTCACATATGGCCGACCTGCTGGGGAC                                        | AGTAGGTACCCTATGCCACGCCGCTTCTT         |
| <b>Microbial COG2154</b>          |                                                                     |                                       |
| Organism                          | Forward (5'-3')                                                     | Reverse (5'-3')                       |
| <i>Bacillus cereus</i>            | AGTCACATATGATGCTACGATTAACCTGAAG                                     | AGTAGGTACCCTACTTCTTATAATGGCTTTTGG     |
| <i>Corynebacterium glutamicum</i> | AGTCACATATGTGCCCATTTTAAGGC                                          | AGTAGGTACCCTAAGCCTCTGCCGAAATG         |
| <i>Cytophaga hutchinsonii</i>     | AGTCACATATGTATGTATTAGTTAATAAGAACC                                   | AGTAGGTACCCTAATTGTCTGATTATGAGC        |
| <i>Leishmania major</i>           | CTAGTCTAGAAATGAAGGAAACAGCTATGCGTCGAACCGCTCCTC                       | CTAGGAATCTCAATGCCTGCGCATCGCTT         |
| <i>Pseudomonas aeruginosa</i>     | AGTCACATATGACCCGACTCACCACAGGCC                                      | AGTAGGTACCCTAATTGCGCCCTCGGCGGT        |
| <i>Saccharomyces cerevisiae</i>   | AGTCAGGATCCGTGAAGGAAAGCCATATGCACAAAGATTGTTAGAATC                    | AGTAGGTACCCTAAGTTGTCATCTCATCGATG      |
| <i>Silicibacter pomeroyi</i>      | AGTCACATATGAGCGAACGTTTGTCCGAG                                       | AGTAGGTACCCTAGCAGAGGCTGTCCATCTT       |
| <i>Streptomyces avermitilis</i>   | AGTCACATATGCCCGTCGAACCGTTGTGCGC                                     | AGTAGGTACCCTAGCTCGCCGCTGCC            |
| <i>Sulfolobus solfataricus</i>    | AGTCACATATGAGTGGGATTTCTCCGA                                         | AGTAGGTACCCTAAGTGTCTTCTTTGTAAAGCT     |
| <i>Synechocystis sp.</i>          | AGTCAGGATCCGTGAAGGAAAGCCATATGGCCACCCCAACGT                          | AGTAGGTACCCTAATCAGCAAAACTATTAGCCTTGGT |

<sup>a</sup>The underlined 5'-terminal sequence is a half-*SmaI* restriction site.
