# Supplementary material
Source: PubMed Central journal article supplement (PMC2287330)
Supplement: plntphys_pp.107.114090_3.pdf [file plntphys_pp.107.114090_3.pdf]

### SUPPLEMENTAL TABLE S3

*Synthetic oligonucleotides used to construct GFP fusion constructs, to screen segregating populations, and to study At1g29810 gene expression*

Restriction sites are underlined. Start codons are in green.

| <b>GFP fusion</b>                  |                                                    |                                |
|------------------------------------|----------------------------------------------------|--------------------------------|
|                                    | Forward (5'-3')                                    | Reverse (5'-3')                |
| <i>At1g29810-GFP</i>               | ATGATCGT <u>CGAC</u> <b>ATG</b> AGTCGGCTCTGCTA     | ATCACCATGGTCTTAGCAACTTCTTCTCCT |
| <i>PiPCD-GFP</i>                   | ATGATCGT <u>CGAC</u> <b>ATG</b> AAAAAGATGGCGATGAAC | ATCACCATGGTGTCTTTGACGCTTCTTTC  |
| <b>Screening plant PCD mutants</b> |                                                    |                                |
|                                    | Forward (5'-3')                                    | Reverse (5'-3')                |
| <i>GABI-kat 648F10</i>             | CTGCCTCAATAAACACAAGTACCA                           | GAGATAAGGAGATACACAAATTCG       |
| <i>pAC161LB</i>                    |                                                    | ATATTGACCATCATACTCATTGC        |
| <i>SALK_121474</i>                 | TAGTCAGCACTTGATGAGGGG                              | TTTATTGAGGCAGTAGCCACC          |
| <i>LBb1</i>                        |                                                    | GCGTGGACCCT TGCTGCAACT         |
| <i>npt</i>                         | GATGCGCTGCGAATCGGG                                 | TCGGCTATGACTGGGCACAACA         |
| <b>PCD expression in mutants</b>   |                                                    |                                |
|                                    | Forward (5'-3')                                    | Reverse (5'-3')                |
| <i>Actin7 (At5g09810)</i>          | ATGGCCGATGGTGAGGAT                                 | GTCTCAAACATGATCTGAGTC          |
| <i>AtPCD</i>                       | ATGAGTCGGCTCTTGCTAC                                | TCACTTAGCAACTTCTTCTTCC         |
| <b>Real time PCR</b>               |                                                    |                                |
|                                    | Forward (5'-3')                                    | Reverse (5'-3')                |
| <i>qPCD (At1g29810)</i>            | CATTTTGCTCCCTCGCAGAT                               | TGGCGCGCAGATCCTT               |
| <i>Actin7 (At5g09810)</i>          | CATTCAATGTCCTGCCATGT                               | GGTTGTACGACCACTGGCATAG         |
